**Table S1. Amyloid prediction of sequential variants in the 39 to 46 positions of the Sup35-27 PFD.** PSI<sup>+</sup> and PSI<sup>-</sup> correspond to 8 residues stretches able to support or not prion conversion when substituting the original sequence in the Sup35-27 variant, respectively. As described by as Toombs and co-workers (Mol Cell Biol. 2010 30(1):319-32). Sequences predicted to be amyloidogenic by WALTZ using the default parameters are shown in bold.

| PSI <sup>+</sup> | PSI <sup>-</sup>         |
|------------------|--------------------------|
| <b>VNIFPYYN</b>  | <b>CKSVCNFD</b> TDPWVPHF |
| <b>VTSGSYNT</b>  | <b>ADSASNAS</b> AQDSHPDI |
| <b>AHTTNMIV</b>  | <b>ICWHTEPY</b> NPEVNPAN |
| <b>LLVHSNAI</b>  | <b>NNPQYLFK</b> THHSHTLP |
| <b>HSNVSVIH</b>  | <b>GANSAITN</b> DERPWCPE |
| <b>TRIWNFSG</b>  | <b>SVNPALYR</b> TAYVRHID |
| <b>GSLSLQYF</b>  | <b>CFLRSYMG</b> YLPFMDTP |
| <b>MLSSNFIH</b>  | <b>NISPFSKD</b> GPTMNNRD |
| <b>SSGPLNFI</b>  | <b>KMTTNTKH</b> PPIVKPRT |
| <b>QFVARVFR</b>  | THRHNKHR VDDRHMFS        |
| <b>LKSVITWN</b>  | KGSPSTPT EAPSKSAQ        |
| <b>SVHVNSTS</b>  | GISTRSQE RPERRSNP        |
| ASNIVMNC         | QVASQNGR VSLSKNRL        |
| YNCSVNML         | LRDPDTCS CIKHINSI        |
| FSIYMPYK         | RKATDLFP PVPSSSQP        |
| WGARQFNI         | DRYK GKPH SHLWRRNR       |
| VTTDILAM         | DPNAALVF DSHTGTTPR       |
| RRDYLTRF         | HIHPLFIH STVPPPHH        |
| STVICGVI         | TLARRDPP VNCARGTA        |
| IHFWRAP          | PNASGIHY SSNKFMHT        |
| TWAPIMVY         | NGPAYPLA GFTKALPG        |
| MFQHGIGV         | ALSSRQWS SGVSTAVR        |
| YHSVEFRI         | IDKNLMSH LNRITLRN        |
| TTVNHFFN         | IVPRNVNC VALIPKTA        |
| IFDIANHS         | HNLANHSH MTQNPPIF        |
| LQPCYCSR         | LSARPLGH LGNPTFHY        |
| CLSPAECR         |                          |
